# Supplementary material for: Very long O‐antigen chains of Salmonella Paratyphi A inhibit inflammasome activation and pyroptotic cell death
Source: PubMed Central journal article supplement (PMC8609438; doi:10.1111/cmi.13306), 2021-01-17
Supplement: CMI-23-e13306-s001.pdf [file CMI-23-e13306-s001.pdf]

## Figure S1. Mylona et al

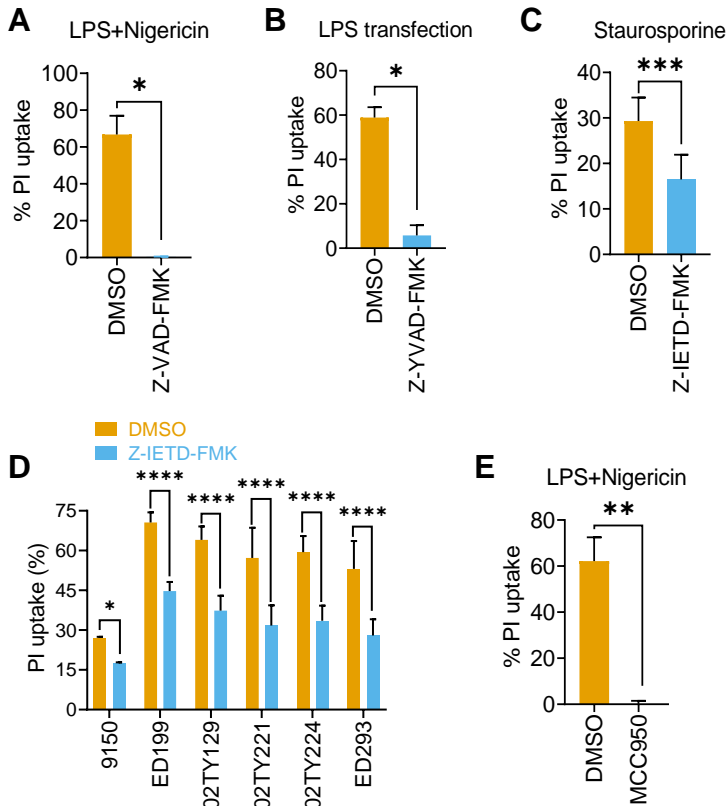

**Figure S1. PI uptake into THP1 cells treated with chemical inhibitors. (A, E)** THP1-cells primed with *E. coli* O111:B5 LPS were treated with either DMSO, Z-VAD-FMK **(A)** or MCC950 **(E)** and then nigericin. **(B)** THP1 cells were treated with Z-YVAD-FMK and transfected with LPS. **(C-D)** THP1 cells were treated with Z-IETD-FMK and then with Staurosporine for 5 h **(C)** or infected with the indicated SPtA strains **(D)**. Mean  $\pm$  SEM from 3 **(A-D)** or 4 **(C)** independent experiments. \*  $P < 0.05$ , \*\*  $P < 0.01$  by paired Student's *t*-test.

## Figure S2. Mylona et al

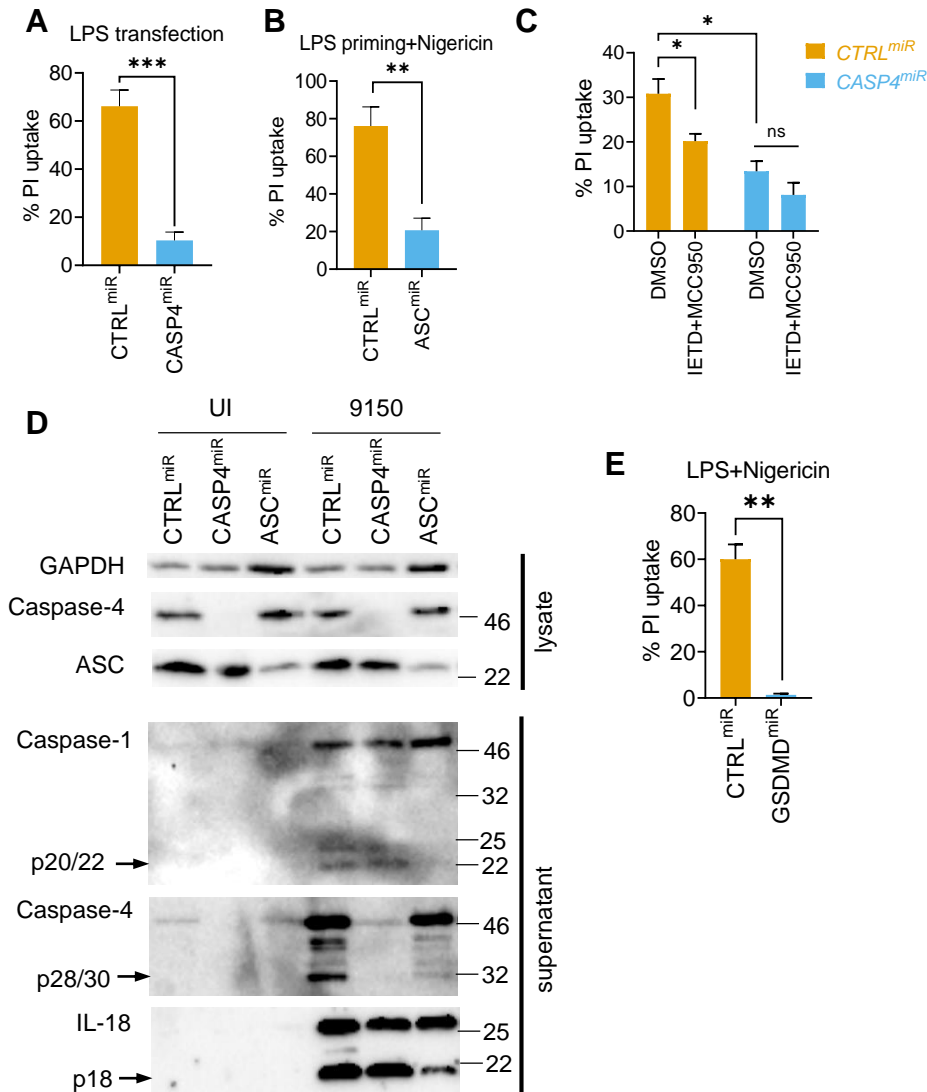

**Figure S2. Functional validation of the miR THP1 cells.** (A) PI uptake into CTRL<sup>miR</sup> and CASP4<sup>miR</sup> THP1 cells transfected with LPS. (B) PI uptake into CTRL<sup>miR</sup> and ASC<sup>miR</sup> THP1 cells primed with *E. coli* O111:B5 LPS and then treated with nigericin. (C) PI uptake into THP1 cells treated with DMSO or IETD plus MCC950 and infected with WT SPtA 9150. (D) Representative (of 2 biological repeats) immunoblots of THP1 cell lines left uninfected (UI) or infected with WT SPtA 9150 for cleaved products of caspase-1, caspase-4 and IL-18 (arrows). (E) PI uptake into CTRL<sup>miR</sup> and GSDMD<sup>miR</sup> THP1 cells primed with *E. coli* O111:B5 LPS followed by nigericin treatment. Mean  $\pm$  SEM means from 6 (A), or 4 (B, C, E) independent experiments are shown. \*\*  $P < 0.01$ , \*\*\*  $P < 0.001$ , for comparisons by paired Student's *t*-test.

### Figure S3. Mylona et al

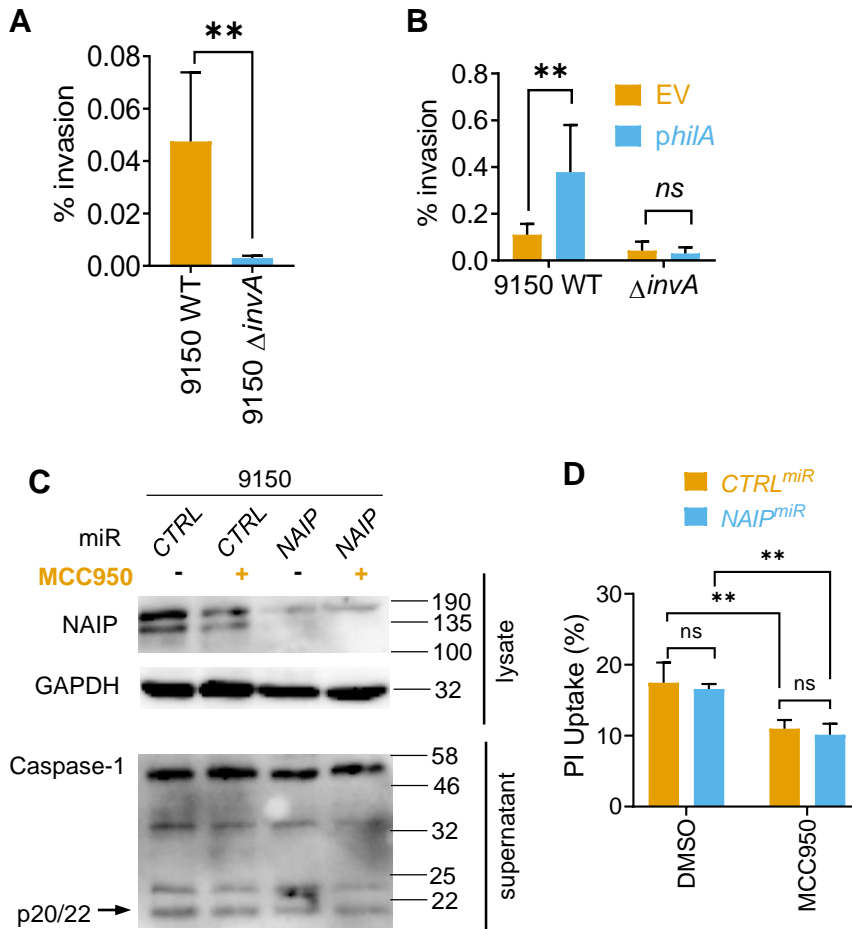

**Figure S3. SPI-1 T3SS is required for HeLa cell invasion by SPtA.** (A-B) Invasion of HeLa cells by the indicated SPtA 9150 strains. (C) Representative (of 3 independent repeats) immunoblots of THP1 cell lines left uninfected (UI) or infected with WT SPtA 9150 in the absence or presence of MCC950 for cleaved products of caspase-1 (arrow). (D) PI uptake assays in the indicated THP1 cells treated with DMSO or MCC950 and infected with WT SPtA 9150 for 3 h. Mean  $\pm$  SEM from 4 (A-B) or 3 (D) independent experiments. \*\*  $P < 0.01$  by (A) paired Student's *t*-test or (B, D) matched two-way ANOVA after correction for multiple comparisons; ns, not significant.

**Figure S4. Mylona et al**

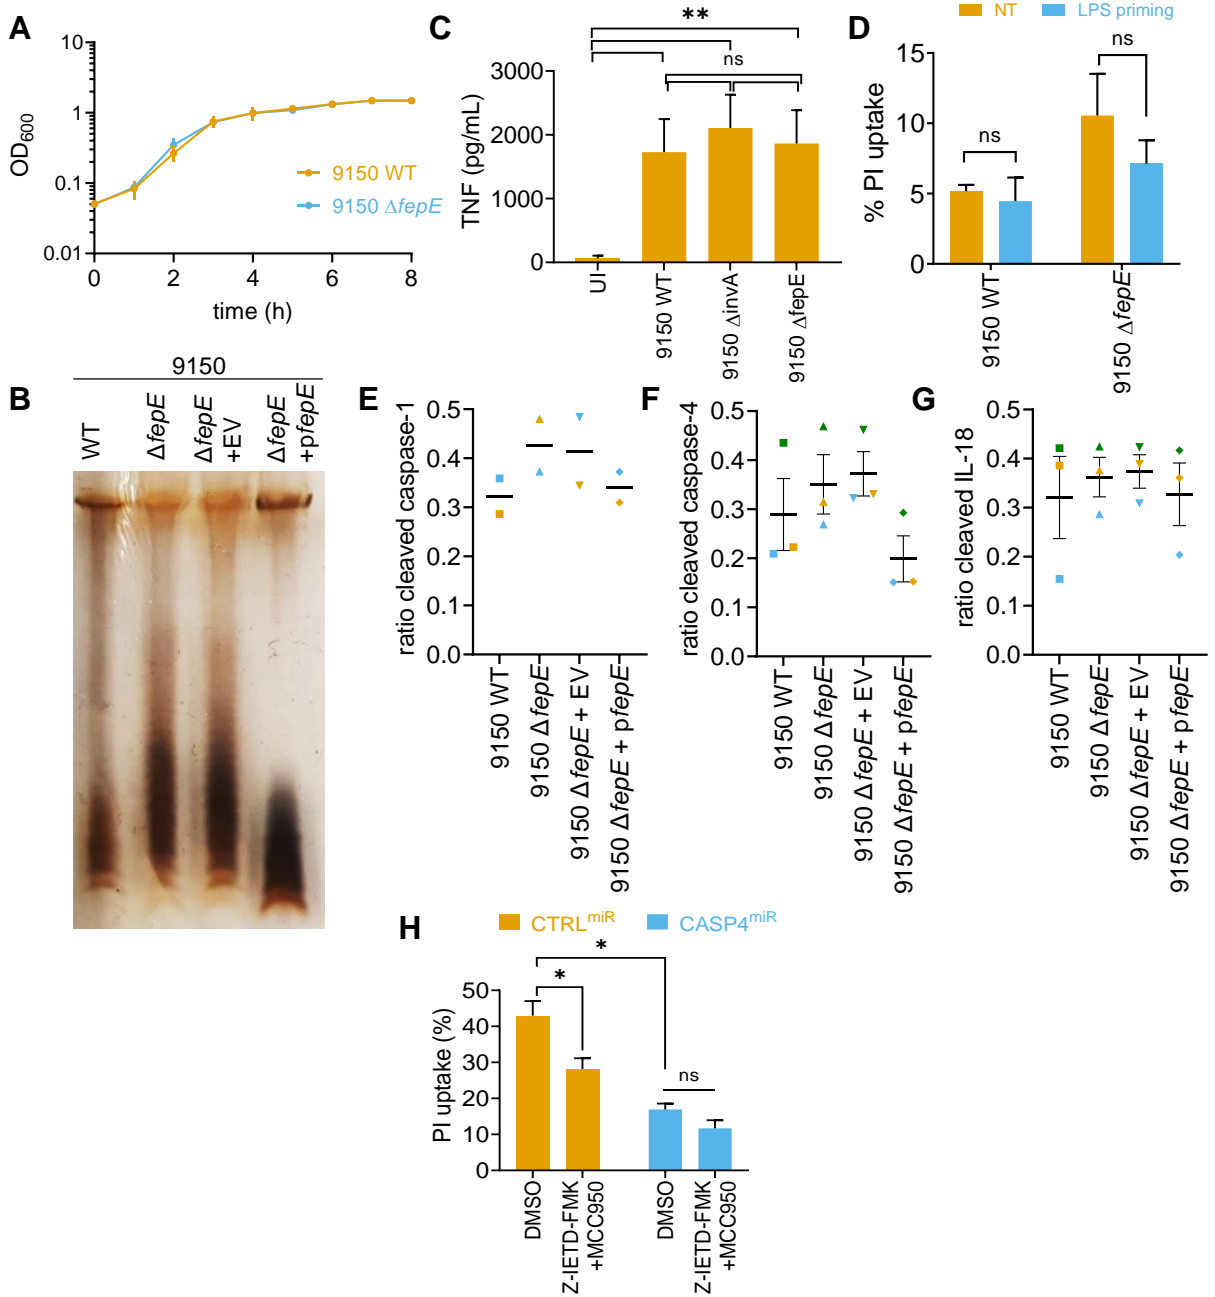

**Figure S4. The effect of loss of very long LPS O-antigen chains on THP1 priming. (A)** Growth curves of WT SPTa 9150 and  $\Delta fepE$  as measured by OD<sub>600</sub>. **(B)** Representative (of 2 biological repeats) image of silver-stained acrylamide gel showing electrophoretic mobility of LPS extracted from the indicated strains of SPTa. **(C)** ELISA quantification of TNF in culture supernatants of THP1 cells infected with the indicated SPTa strains. **(D)** PI uptake into unprimed THP1 cells (NT) or primed with *E. coli* O111:B5 LPS before infection with WT SPTa 9150 or  $\Delta fepE$ . **(E-G)** Quantification of luminescent bands of western blots of caspase-1 (E), caspase-4 (F), and IL-18 (G) showing the ratio of the cleaved protein to the sum of cleaved plus pro-form of each protein in the supernatant of THP-1 cells infected with the indicated SPTa strains. **(H)** PI uptake into CTRL<sup>miR</sup> or CASP4<sup>miR</sup> THP1 cells infected with SPTa in the presence of DMSO alone or Z-IETD-FMK plus MCC950. Mean  $\pm$  SEM from 2 (A), 3 (B, E-G) or 4 (D, H) independent experiments. \*  $P < 0.05$ , \*\*  $P < 0.01$  for indicated comparisons by matched one-way ANOVA (C, E-G) or two-way ANOVA (D, H) after correction for multiple comparisons; ns, not significant.

## Figure S5. Mylona et al

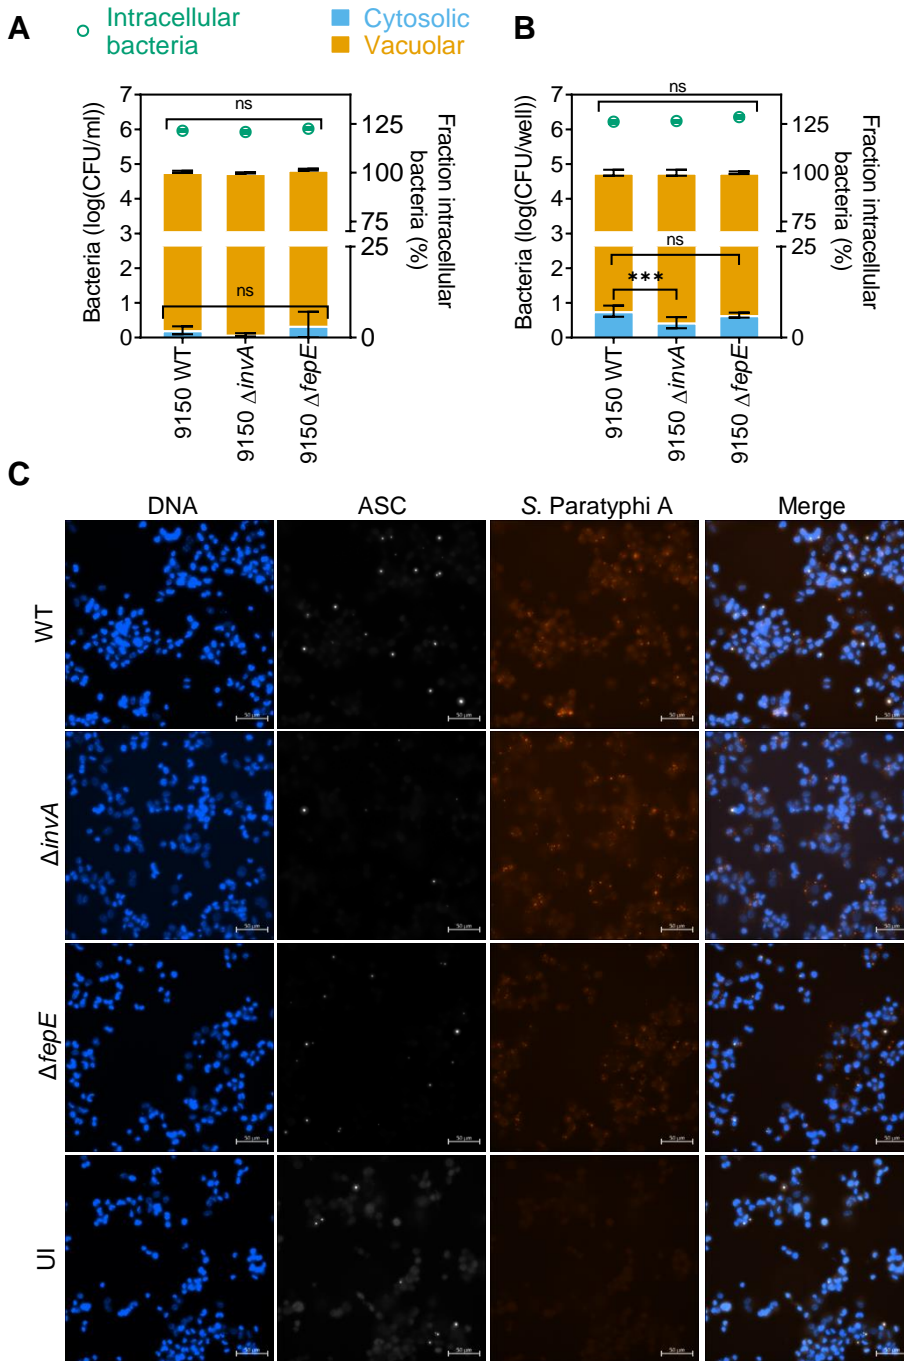

**Figure S5. The role of very long O-antigen chains in vacuolar escape and ASC speck formation.** (A-B) Bacterial internalisation (left-axis) or relative cytosolic escape measured by chloroquine-resistance assay (right-axis) of the indicated SPtA strains into GSDMD<sup>miR</sup> THP-1 cells at 1.5 h (A) or 3 h (B). (C) Representative (of 4 biological repeats) images from THP1-ASC<sup>mRFP</sup> cells left uninfected (UI) or infected with the indicated SPtA strains. Scale bar 50  $\mu$ m. Means  $\pm$  SEM from 5 (A) or 3 (B) independent repeats are depicted. \*\*\*  $P < 0.001$  by matched one-way ANOVA after correction for multiple comparisons; ns, not significant for comparison of WT SPtA with other strains.

**Figure S6. Mylona et al**

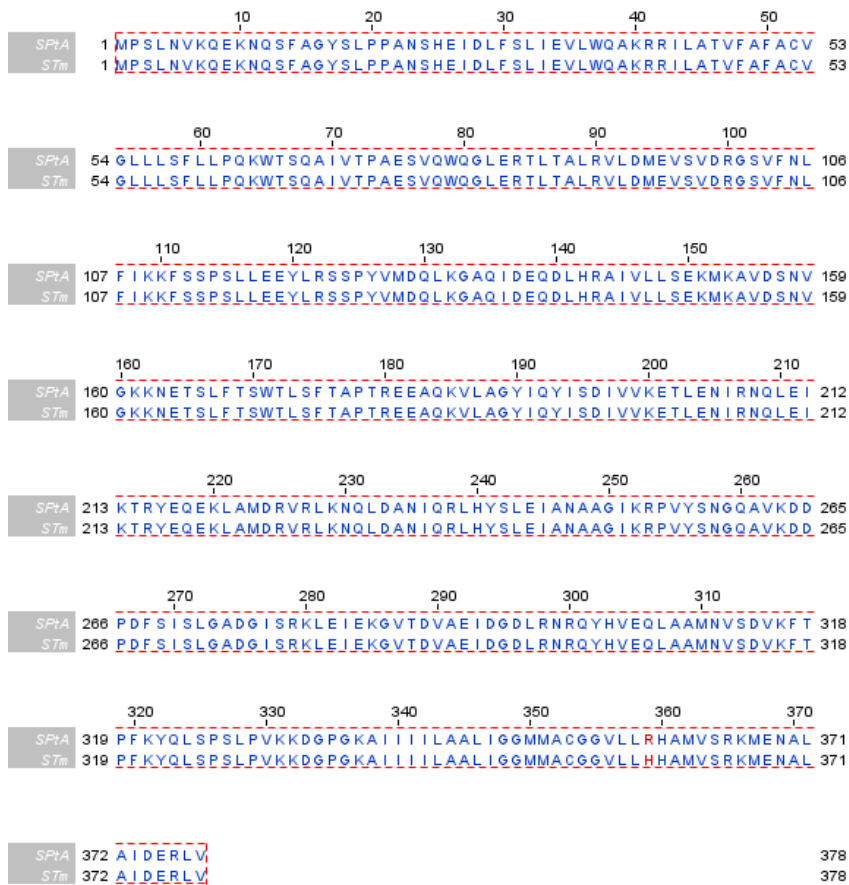

**Figure S6. Protein sequence alignment of SPtA and STm *fepE*.** Amino acid sequence of SPtA 9150 *fepE* and STm *fepE*; amino acid differences are depicted in red.

**Table S1. Strains and plasmids used in this study**

| Strain or plasmid name                                                  | Source                 | Identifier |
|-------------------------------------------------------------------------|------------------------|------------|
| <b>Strains</b>                                                          |                        |            |
| <i>Salmonella enterica</i> serovar Paratyphi A ATCC 9150 (SPtA 9150) WT | (Gal-Mor et al., 2012) | N/A        |
| SPtA ED199                                                              | (Dolecek et al., 2008) | N/A        |
| SPtA 02TY129                                                            | (Arjyal et al., 2016)  | N/A        |
| SPtA 02TY221                                                            | (Arjyal et al., 2016)  | N/A        |
| SPtA 02TY224                                                            | (Arjyal et al., 2016)  | N/A        |
| SPtA ED293                                                              | (Dolecek et al., 2008) | N/A        |
| SPtA 9150 $\Delta$ <i>fepE</i> ::Kan <sup>r</sup>                       | This study             | ICC 1913   |
| SPtA 9150 $\Delta$ <i>invA</i> ::Kan <sup>r</sup>                       | This study             | ICC 1874   |
| <i>Salmonella enterica</i> serovar Typhimurium 14028 (STm) WT           | (Johnson et al., 2018) | ICC 797    |
| STm $\Delta$ <i>fepE</i> ::Kan <sup>r</sup>                             | This study             |            |
| <b>Plasmids</b>                                                         |                        |            |
| pWS29K-Spec EV                                                          | (Johnson et al., 2017) | pICC2489   |
| pWSK29-Spec- <i>hilA</i>                                                | This study             | pICC2767   |
| pWSK29-Spec- <i>fepE</i>                                                | This study             | pICC2768   |

**Table S2. Primers used in this study**

| Primer name                                                                                                         | Source                                                   | Identifier             |
|---------------------------------------------------------------------------------------------------------------------|----------------------------------------------------------|------------------------|
| 5 <sup>'</sup> TCATTGGATAAAGTTTTTCAGGT<br>CATACGGCATGCCATCTCTTAAT<br>GTAAACTGTGTAGGCTGGAGC<br>TGCTTCG <sup>3'</sup> | This study (for generating<br><i>ΔfepE</i> )             | N/A                    |
| 5 <sup>'</sup> CATATGAATATCCTCCTTAGGG<br>ATATCGCTATCCGGCTTTTCGG<br>GTAATCAGACTAACCGTTCATC<br>TA <sup>3'</sup>       | This study (for generating<br><i>ΔfepE</i> )             | N/A                    |
| 5 <sup>'</sup> AGGCAAGTTTAATTCCGAATAT<br>TTAGC <sup>3'</sup>                                                        | This study (for sequencing<br><i>fepE</i> deletion)      | N/A                    |
| 5 <sup>'</sup> TATGGGCTGCGCTGTATGATTA<br>TC <sup>3'</sup>                                                           | This study (for sequencing<br><i>fepE</i> deletion)      | N/A                    |
| 5 <sup>'</sup> ACTTAACAGTGCTCGTTTACGA<br>CCTGAATTACTGATTCTGGTACT<br>AATGGGTGTAGGCTGGAGCTGC<br>TTC <sup>3'</sup>     | This study (for generating<br><i>ΔinvA</i> )             | (Johnson et al., 2017) |
| 5 <sup>'</sup> GCTATCTGCTATCTCACCGAAA<br>GATAAACCTCCAGATCCGGAA<br>AACGACCCATATGAATATCCTCC<br>TTAG <sup>3'</sup>     | This study (for generating<br><i>ΔinvA</i> )             | (Johnson et al., 2017) |
| 5 <sup>'</sup> GTTACGTAGTATGACCGATATT<br>GC <sup>3'</sup>                                                           | This study (for sequencing<br><i>invA</i> deletion)      | (Johnson et al., 2017) |
| 5 <sup>'</sup> CCTCCAATTAATGAAGGATCGC<br>3 <sup>'</sup>                                                             | This study (for sequencing<br><i>invA</i> deletion)      | (Johnson et al., 2017) |
| 5 <sup>'</sup> GCTCCACCGCGGTGGCGGCC<br>ATGCCACATTTAATCCTG <sup>3'</sup>                                             | This study (for generating<br>pWSK29-Spec- <i>hilA</i> ) | N/A                    |
| 5 <sup>'</sup> GGATCCACTAGTTCTAGAGCTT<br>ACCGTAATTTAATCAAGCG <sup>3'</sup>                                          | This study (for generating<br>pWSK29-Spec- <i>hilA</i> ) | N/A                    |
| 5 <sup>'</sup> GCTCTAGAACTAGTGGATC <sup>3'</sup>                                                                    | This study (for generating<br>pWSK29-Spec- <i>hilA</i> ) | N/A                    |
| 5 <sup>'</sup> GGCCGCCACCGCGGTGGA <sup>3'</sup>                                                                     | This study (for generating<br>pWSK29-Spec- <i>hilA</i> ) | N/A                    |
| 5 <sup>'</sup> CTCCACCGCGATGCCATCTCTT<br>AATGTAAAAC <sup>3'</sup>                                                   | This study (for generating<br>pWSK29-Spec- <i>fepE</i> ) | N/A                    |
| 5 <sup>'</sup> TACCGGGCCCTCAGACTAACCC<br>GTTTCATC <sup>3'</sup>                                                     | This study (for generating<br>pWSK29-Spec- <i>fepE</i> ) | N/A                    |
| 5 <sup>'</sup> GTTAGTCTGAGGGCCCGGTAC<br>CCAATTC <sup>3'</sup>                                                       | This study (for generating<br>pWSK29-Spec- <i>fepE</i> ) | N/A                    |
| 5 <sup>'</sup> GAGATGGCATCGCGGTGGAGC<br>TCCAGCT <sup>3'</sup>                                                       | This study (for generating<br>pWSK29-Spec- <i>fepE</i> ) | N/A                    |
| 5 <sup>'</sup> GGTTGCTTCTGTCCTTTCTG 3 <sup>'</sup>                                                                  | This study (RT-qPCR for<br><i>fepE</i> )                 | N/A                    |



|                           |                                       |     |
|---------------------------|---------------------------------------|-----|
| 5'TTACCTCCATATCCAACACGC3' | This study (RT-qPCR for <i>fepE</i> ) | N/A |
| 5'TGTAGCGGTGAAATGCGTAG3'  | This study (RT-qPCR for 16S)          | N/A |
| 5'CAAGGGCACAACCTCCAAG3'   | This study (RT-qPCR for 16S)          | N/A |

**Table S3. Cell lines (A) and oligopeptides (B) used in this study**

| <b>(A) Cell line name</b>                                          | <b>Source</b>                                       | <b>Identifier</b> |
|--------------------------------------------------------------------|-----------------------------------------------------|-------------------|
| THP-1                                                              | John MacMicking laboratory<br>(Shenoy et al., 2012) | N/A               |
| HeLa                                                               | ATCC                                                | ATCC CCL-2        |
| <b>(B) Oligopeptide name</b>                                       | <b>Source</b>                                       | <b>Identifier</b> |
| pMX-CMV-YFP-LacZ <sup>miR 5'</sup> -<br>TCACGACGTTGT AATACGACGT-3' | (Eldridge et al., 2017)                             | N/A               |
| pMX-mAsc-mRFP                                                      | (Goddard et al., 2019)                              | N/A               |
| pMX-CMV-YFP-GSDMD <sup>miR 5'</sup> -<br>TACACATTCATTGAGGTGCTGG-3' | (Eldridge et al., 2017)                             | N/A               |
| pMX-CMV-YFP-CASP4 <sup>miR 5'</sup> -<br>ATATCTTGTCATGGACAGTCGT-3' | (Goddard et al., 2019;<br>Pallett et al., 2016)     | N/A               |
| pMX-CMV-YFP-ASC <sup>miR 5'</sup> -<br>CAGCTCTTCAGTTTCACACCAG-3'   | (Goddard et al., 2019)                              | N/A               |
| pMX-CMV-YFP-NAIP <sup>miR 5'</sup> -<br>ATTCACAAAGTTCACCACGGCT-3'  | This study                                          | N/A               |

**Table S4. Chemicals, reagents and antibodies used in this study**

| <b>Chemical/Reagent name</b>                                           | <b>Source</b>                          | <b>Identifier</b>                  |
|------------------------------------------------------------------------|----------------------------------------|------------------------------------|
| Mouse anti-human Caspase-4 (4B9) antibody                              | Santa Cruz Biotechnology               | Cat# sc-56056, RRID:AB_781828      |
| anti-Caspase-1 (p20) (human) mAb (Bally-1) antibody                    | AdipoGen                               | Cat# AG-20B-0048, RRID:AB_2490257  |
| Human IL-18 Polyclonal Antibody                                        | MBL International                      | Cat# PM014, RRID:AB_592017         |
| anti-Asc pAb (AL177) antibody                                          | AdipoGen                               | Cat# AG-25B-0006, RRID:AB_2490440  |
| Mouse Anti-Human GSDMDC1 Monoclonal Antibody, Unconjugated, Clone 64-Y | Santa Cruz Biotechnology               | Cat# sc-81868, RRID:AB_2263768     |
| Mouse anti-human NAIP                                                  | R&D Systems                            | Cat# MAB829                        |
| Rabbit anti-GAPDH                                                      | Abcam                                  | Cat# ab9485                        |
| DnaK (E. coli), mAb (8E2/2) antibody                                   | Enzo Life Sciences                     | Cat# ADI-SPA-880, RRID:AB_10619012 |
| Rabbit anti-SipA (Salmonella)                                          | V Koronakis Lab (Johnson et al., 2017) | N/A                                |
| Rabbit anti-SipC (Salmonella)                                          | V Koronakis Lab (Johnson et al., 2017) | N/A                                |
| Rabbit anti-SipD (Salmonella)                                          | V Koronakis Lab (Johnson et al., 2017) | N/A                                |
| Goat anti-CSA-1                                                        | Insight Biotechnology                  | Cat# 01-91-99                      |
| Peroxidase AffiniPure Goat Anti-Mouse IgG, Fcγ fragment specific       | Jackson Immunoresearch                 | Cat# 115-035-008 RRID: AB_2313585  |
| Peroxidase AffiniPure Goat Anti-Rabbit IgG, Fc fragment specific       | Jackson Immunoresearch                 | Cat# 111-035-008 RRID: AB_2337937  |
| Donkey anti-goat immunoglobulin-Cy2                                    | Jackson ImmunoResearch                 | Cat# 705-225-147 RRID: AB_2307341  |
| Hoechst 33258                                                          | Sigma-Aldrich                          | Cat# 94403                         |
| Phalloidin Alexa647                                                    | Startech                               | Cat# 23127-AAT                     |
| LPS-EB (LPS from E. coli O111:B4)                                      | Invivogen                              | Cat# tlrl-3pelps                   |
| Chloroquine                                                            | Sigma-Aldrich                          | Cat# C6628                         |
| Nigericin                                                              | Sigma-Aldrich                          | Cat# N7143                         |
| Kanamycin                                                              | Sigma-Aldrich                          | Cat# 60615                         |
| Spectinomycin dihydrochloride pentahydrate                             | Sigma-Aldrich                          | Cat# S9007                         |
| Puromycin dihydrochloride from Streptomyces alboniger                  | Sigma-Aldrich                          | Cat# P8833                         |

|                                                        |                          |                 |
|--------------------------------------------------------|--------------------------|-----------------|
| Gentamicin                                             | Sigma-Aldrich            | Cat # G1272     |
| MCC950                                                 | Tocris Bioscience        | Cat # 5479      |
| Lipofectamine 2000 Transfection Reagent                | Life Technologies        | Cat# 11668027   |
| Pierce Protease Inhibitor Mini Tablets, EDTA-free      | Thermo Fisher Scientific | Cat# A32955     |
| ECL Prime Western Blotting Detection Reagent           | GE-Healthcare            | Cat# RPN2236    |
| Propidium iodide (PI)                                  | Sigma-Aldrich            | Cat # P4864     |
| ProLong Gold Antifade Mountant                         | Thermo Fisher Scientific | Cat# P36930     |
| Phenylmethanesulfonyl fluoride                         | Sigma-Aldrich            | Cat# P7626      |
| Phorbol myristate acetate (PMA)                        | Sigma-Aldrich            | Cat# P8139      |
| HEPES solution                                         | Sigma-Aldrich            | Cat# H0887      |
| Trypsin                                                | Sigma-Aldrich            | Cat# T4674      |
| EDTA 0.2% cell culture                                 | Sigma-Aldrich            | Cat# E8008      |
| Dulbecco's minimal Eagle media High Glucose (4500mg/L) | Sigma-Aldrich            | Cat# D5796      |
| RPMI 1640                                              | Sigma-Aldrich            | Cat# R8758      |
| RPMI 1640 – Phenol Red Free                            | Gibco                    | Cat# 11835030   |
| Fetal Bovine Serum                                     | Gibco                    | Cat# 10270-106  |
| Sodium pyruvate                                        | Sigma-Aldrich            | Cat# S8636      |
| Penicillin-Streptomycin                                | Sigma-Aldrich            | Cat# 31985062   |
| GlutaMAX supplement                                    | ThermoFisher Scientific  | Cat# 35050061   |
| Gibson assembly master mix                             | NEB                      | Cat# E2611      |
| Z-VAD-FMK                                              | R&D Systems              | Cat# FMK001     |
| Z-YVAD-FMK                                             | R&D Systems              | Cat# FMK001     |
| Z-IETD-FMK                                             | R&D Systems              | Cat# FMK007     |
| Staurosporine                                          | Sigma-Aldrich            | Cat# S5921      |
| Paraformaldehyde (PFA)                                 | ThermoFisher Scientific  | Cat# 28908      |
| TNF alpha Human Uncoated ELISA Kit                     | ThermoFisher Scientific  | Cat# 88-7346-22 |
| Power Up SYBR Green                                    | Applied Biosystems       | Cat# 15350929   |
| MycAlert mycoplasma detection kit                      | Lonza                    | Cat# LT07-518   |
| IL-1beta Human Uncoated ELISA Kit                      | ThermoFisher Scientific  | Cat# 88-7261-22 |
| RNAprotect                                             | Qiagen                   | Cat# 76526      |
| RNeasy Mini Kit                                        | Qiagen                   | Cat# 74106      |
| MMLV reverse transcriptase                             | Promega                  | Cat# M1706      |

|          |         |            |
|----------|---------|------------|
| DNase    | Promega | Cat# M6101 |
| Lysozyme | Sigma   | Cat# L6876 |

- Arjyal, A., Basnyat, B., Nhan, H. T., Koirala, S., Giri, A., Joshi, N., Shakya, M., Pathak, K. R., Mahat, S. P., Prajapati, S. P., Adhikari, N., Thapa, R., Merson, L., Gajurel, D., Lamsal, K., Lamsal, D., Yadav, B. K., Shah, G., Shrestha, P., ... Dolecek, C. (2016). Gatifloxacin versus ceftriaxone for uncomplicated enteric fever in Nepal: An open-label, two-centre, randomised controlled trial. *The Lancet Infectious Diseases*, *16*(5), 535–545. [https://doi.org/10.1016/S1473-3099\(15\)00530-7](https://doi.org/10.1016/S1473-3099(15)00530-7)
- Dolecek, C., La, T. T. P., Rang, N. N., Phuong, L. T., Vinh, H., Tuan, P. Q., Du, D. C., Bay, N. T. B., Long, D. T., Ha, L. B., Binh, N. T., Hong, N. T. A., Dung, P. N., Lanh, M. N., Van Be Bay, P., Ho, V. A., Van Minh Hoang, N., Nga, T. T. T., Chau, T. T., ... Farrar, J. (2008). A multi-center randomised controlled trial of gatifloxacin versus azithromycin for the treatment of uncomplicated typhoid fever in children and adults in Vietnam. *PLoS ONE*, *3*(5). <https://doi.org/10.1371/journal.pone.0002188>
- Eldridge, M. J. G., Sanchez-Garrido, J., Hoben, G. F., Goddard, P. J., & Shenoy, A. R. (2017). The Atypical Ubiquitin E2 Conjugase UBE2L3 Is an Indirect Caspase-1 Target and Controls IL-1 $\beta$  Secretion by Inflammasomes. *Cell Reports*, *18*(5), 1285–1297. <https://doi.org/10.1016/j.celrep.2017.01.015>
- Gal-Mor, O., Suez, J., Elhadad, D., Porwollik, S., Leshem, E., Valinsky, L., McClelland, M., Schwartz, E., & Rahav, G. (2012). Molecular and Cellular Characterization of a *Salmonella enterica* Serovar Paratyphi A Outbreak Strain and the Human Immune Response to Infection. *Clinical and Vaccine Immunology*, *19*(2), 146–156. <https://doi.org/10.1128/cvi.05468-11>
- Goddard, P. J., Sanchez-Garrido, J., Slater, S. L., Kalyan, M., Ruano-Gallego, D., Marchès, O., Fernández, L. Á., Frankel, G., & Shenoy, A. R. (2019). Enteropathogenic *Escherichia coli* Stimulates Effector-Driven Rapid Caspase-4 Activation in Human Macrophages. *Cell Reports*, *27*(4), 1008-1017.e6. <https://doi.org/10.1016/j.celrep.2019.03.100>
- Johnson, R., Byrne, A., Berger, C. N., Klemm, E., Crepin, V. F., Dougan, G., & Frankel, G. (2017). The type III secretion system effector SptP of *Salmonella enterica* serovar Typhi. *Journal of Bacteriology*, *199*(4), JB.00647-16. <https://doi.org/10.1128/JB.00647-16>
- Johnson, R., Ravenhall, M., Pickard, D., Dougan, G., Byrne, A., & Frankel, G. (2018). Comparison of *Salmonella enterica* serovars Typhi and Typhimurium reveals typhoidal serovar-specific responses to bile. *Infection and Immunity*, *86*(3), IA1.00490-17. <https://doi.org/10.1128/IAI.00490-17>
- Pallett, M., Crepin, V., Serafini, N., Habibzay, M., Kotik, O., Sanchez-Garrido, J., Santo, D., Shenoy, A., Berger, C., & Frankel, G. (2016). Bacterial virulence factor inhibits caspase-4/11 activation in intestinal epithelial cells. *Nature Publishing Group*, *10*. <https://doi.org/10.1038/mi.2016.77>
- Shenoy, A. R., Wellington, D. A., Kumar, P., Kassa, H., Booth, C. J., Cresswell, P., & MacMicking, J. D. (2012). GBP5 Promotes NLRP3 Inflammasome Assembly and Immunity in Mammals. *Science*, *336*(6080), 481–485. <https://doi.org/10.1126/science.1217032>
